# Supplementary material for: Relationship of obesity to adipose tissue insulin resistance
Source: PubMed Central journal article supplement — BMJ Open Diabetes Res Care. 2020 Apr 2;8(1):e000741. doi: 10.1136/bmjdrc-2019-000741 (PMC7254100; doi:10.1136/bmjdrc-2019-000741), 2020-04-02
Supplement: bmjdrc-2019-000741supp001.pdf [file bmjdrc-2019-000741supp001.pdf]

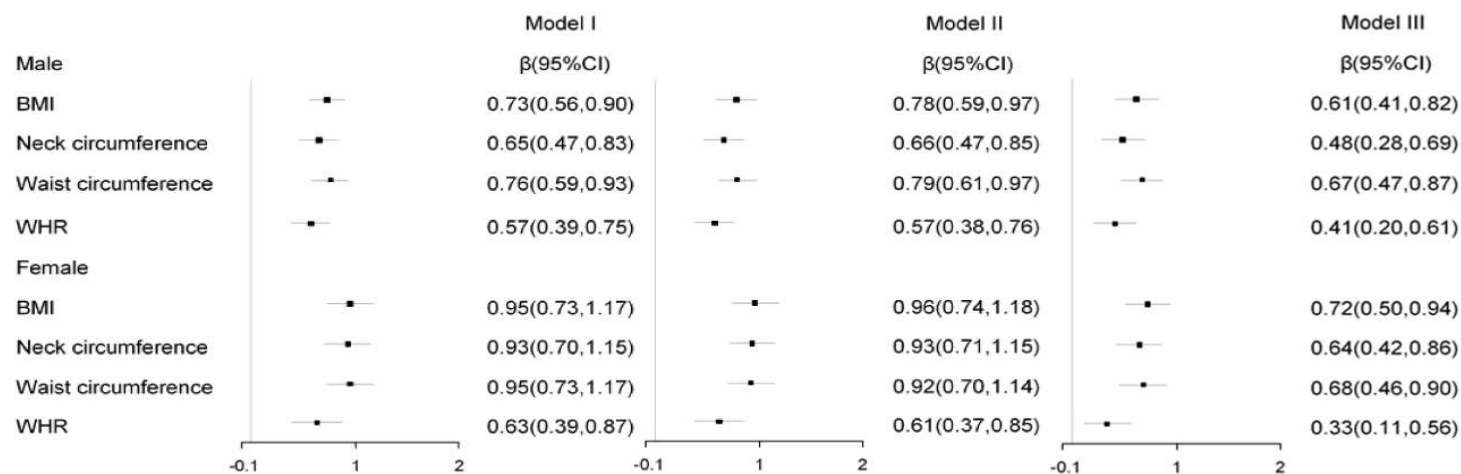

Figure S1. Correlation of anthropometric indicators with adipose tissue insulin resistance index stratified by gender.  $\beta$ (unstandardized coefficients) and 95% CI (95% confidence interval): from linear regression analysis. Model I, unadjusted; Model II, adjusted for age, income, education level, current smoking status and current drinking status; Model III, Model II+ adjusted for SBP, DBP, FPG, 2h-PG, HDL-C, LDL-C, TG and TC.

Table S1. Association of the best anthropometric indicators and lipid profiles with Adipo-IR stratified by gender

|        | OR(95% CI)      | AUC   |
|--------|-----------------|-------|
| Male   |                 |       |
| WC     | 3.43(2.03,5.82) | 0.788 |
| TC     | 0.45(0.11,1.90) | 0.619 |
| TG     | 3.21(1.28,8.04) | 0.738 |
| LDL    | 2.54(0.68,9.45) | 0.594 |
| HDL    | 1.51(0.71,3.20) | 0.347 |
| Female |                 |       |
| BMI    | 3.08(2.04,4.66) | 0.779 |
| TC     | 1.83(0.40,8.30) | 0.589 |
| TG     | 1.27(0.57,2.85) | 0.724 |
| LDL    | 0.89(0.25,3.20) | 0.543 |
| HDL    | 0.73(0.39,1.38) | 0.396 |

OR (odds ratio) and 95% CI (95% confidence interval): from logistic regression analysis;

In this model, we put the best anthropometric indicator, lipid profiles and adjusted for age, income, education level, current smoking status and current drinking status, SBP, DBP, FPG and 2h-PG;

AUC, area under the ROC-curves for Anthropometric indicators for Distinguishing Adipo-IR in male and female.

Table S2. Association of anthropometric indicators with Adipo-IR stratified by gender in different populations

|                     | Non-diabetes    | Non-CVD         | Non-fat liver   | Non-metabolic diseases |
|---------------------|-----------------|-----------------|-----------------|------------------------|
| Male, n             | 198             | 217             | 211             | 171                    |
| BMI                 | 3.11(1.78,5.43) | 2.45(1.49,4.01) | 2.59(1.52,4.44) | 2.40(1.30,4.44)        |
| Neck circumference  | 2.69(1.61,4.50) | 1.94(1.25,3.00) | 2.03(1.25,3.29) | 2.29(1.28,4.10)        |
| Waist circumference | 4.64(2.40,8.98) | 3.21(1.85,5.59) | 3.25(1.83,5.79) | 3.79(1.83,7.83)        |
| WHR                 | 1.88(1.13,3.13) | 1.55(0.99,2.43) | 1.70(1.05,2.75) | 1.95(1.05,3.60)        |
| Female, n           | 216             | 242             | 237             | 179                    |
| BMI                 | 2.86(1.80,4.55) | 3.59(2.24,5.75) | 2.95(1.88,4.63) | 3.36(1.86,6.04)        |
| Neck circumference  | 2.14(1.39,3.29) | 2.95(1.87,4.66) | 2.63(1.66,4.18) | 2.53(1.43,4.45)        |
| Waist circumference | 2.54(1.65,3.93) | 3.47(2.22,5.42) | 2.87(1.83,4.49) | 3.26(1.78,5.99)        |
| WHR                 | 1.79(1.21,2.64) | 1.93(1.33,2.80) | 1.68(1.12,2.54) | 2.00(1.20,3.32)        |

Adjusted for age, income, education level, current smoking status and current drinking status, SBP, DBP, FPG, 2h-PG, HDL,LDL,TG,TC.

None metabolism disease included the population of none disease of diabetes, CVD and fat liver.

OR (odds ratio) and 95% CI (95% confidence interval): from logistic regression analysis.

Table S3. Optimal cutoffs of anthropometric indicators for distinguishing Adipo-IR using ROC curve analysis

|                     | Cut-off value, cm | Sensitivity(95%CI),% | Specificity(95%CI),% | +LR  | -LR  | AUC(95%CI)         | <i>P</i> value |
|---------------------|-------------------|----------------------|----------------------|------|------|--------------------|----------------|
| Male                |                   |                      |                      |      |      |                    |                |
| Waist circumference | 83.5              | 0.91(0.82,0.96)      | 0.54(0.46,0.62)      | 1.98 | 0.17 | 0.788(0.730,0.846) | Ref            |
| BMI                 | 22.04             | 0.86(0.76,0.93)      | 0.61(0.53,0.69)      | 2.21 | 0.23 | 0.774(0.712,0.835) | 0.48           |
| Neck circumference  | 36.25             | 0.78(0.67,0.87)      | 0.66(0.58,0.73)      | 2.28 | 0.34 | 0.754(0.689,0.819) | 0.18           |
| WHR                 | 0.88              | 0.91(0.82,0.96)      | 0.43(0.35,0.51)      | 1.60 | 0.21 | 0.690(0.623,0.756) | 0.08           |
| Female              |                   |                      |                      |      |      |                    |                |
| BMI                 | 21.77             | 0.92(0.85,0.97)      | 0.51(0.44,0.59)      | 1.89 | 0.15 | 0.779(0.721,0.836) | Ref            |
| Neck circumference  | 33.75             | 0.72(0.61,0.81)      | 0.71(0.64,0.77)      | 2.46 | 0.40 | 0.774(0.716,0.832) | 0.74           |
| Waist circumference | 84.75             | 0.73(0.63,0.82)      | 0.71(0.64,0.78)      | 2.55 | 0.38 | 0.772(0.713,0.830) | 0.84           |
| WHR                 | 0.89              | 0.69(0.58,0.78)      | 0.60(0.53,0.67)      | 1.72 | 0.52 | 0.674(0.607,0.741) | 0.003          |

+LR, Positive predictive ; -LR, Negative predictive; *p* value in male, comparison AUC of waist circumference to other indicators'; *p* value in female, comparison AUC of BMI to other indicators'.

Table S4. Distribution of adipose tissue insulin resistance in participants with different obesity phenotypes

|      | Total, N | Adipo-IR, n(%) | Non-Adipo-IR, n(%) |
|------|----------|----------------|--------------------|
| B0W0 | 236      | 42(17.8)       | 194(82.2)          |
| B1W0 | 7        | 1(14.3)        | 6(85.7)            |
| B0W1 | 157      | 53(33.8)       | 104(66.2)          |
| B1W1 | 99       | 70(70.7)       | 29(29.3)           |

B0/B1: without/with general obesity; W0/W1: without/with abdominal obesity.

Table S5. Comparison of the prevalence of metabolic disease in participants with and without adipose tissue insulin resistance

|        | DM           |                 |          | CVD         |                  |          | Fat liver   |                  |          |
|--------|--------------|-----------------|----------|-------------|------------------|----------|-------------|------------------|----------|
|        | n/N(%)       | OR(95% CI)      | <i>p</i> | n/N(%)      | OR(95% CI)       | <i>p</i> | n/N(%)      | OR(95% CI)       | <i>p</i> |
| B0W0A0 | 21/194(10.8) | Ref.            |          | 12/194(6.2) | Ref.             |          | 3/194(1.5)  | Ref.             |          |
| B0W0A1 | 8/42(19.0)   | 2.04(0.78,5.38) | 0.15     | 7/42(16.7)  | 3.75(1.11,12.67) | 0.033    | 3/42(7.1)   | 5.89(0.93,37.29) | 0.06     |
| B1W0A0 | 0/6          | -               | -        | 0/6         | -                | -        | 0/6         | -                | -        |
| B1W0A1 | 0/1          | -               | -        | 0/1         | -                | -        | 0/1         | -                | -        |
| B0W1A0 | 18/104(17.3) | Ref.            |          | 7/104(6.7)  | Ref.             |          | 10/104(9.6) | Ref.             |          |
| B0W1A1 | 17/53(32.1)  | 2.20(0.93,5.18) | 0.07     | 4/53(7.5)   | 1.24(0.31,4.91)  | 0.76     | 7/53(13.2)  | 1.27(0.42,3.86)  | 0.67     |
| B1W1A0 | 5/29(17.2)   | Ref.            | -        | 2/29(6.9)   | Ref.             |          | 5/29(17.2)  | Ref.             |          |
| B1W1A1 | 16/70(22.9)  | 1.17(0.34,4.00) | 0.80     | 8/70(11.4)  | 1.80(0.28,11.37) | 0.53     | 22/70(31.4) | 2.40(0.72,8.05)  | 0.16     |

Adjusted: sex, age, income, education level, current smoking status and current drinking status.

B0/B1: without/with general obesity; W0/W1: without/with abdominal obesity; A0/A1: without/with adipose tissue insulin resistance.
